# Supplementary material
Source: publisher figshare collection journal article supplement (https://frontiersin.figshare.com/ndownloader/files/28759083)
Supplement: Supplementary file [file 28759083]

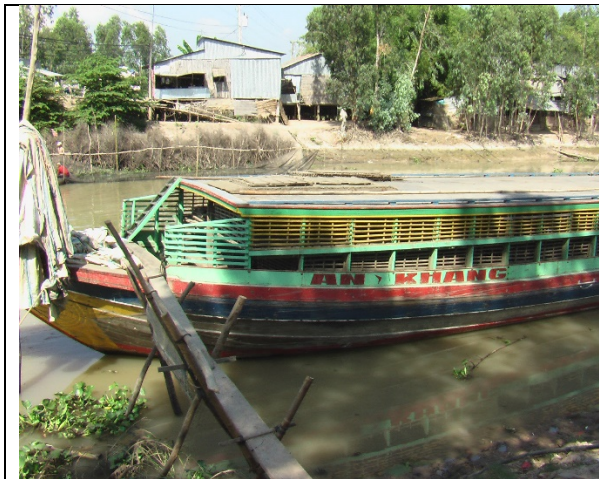

Boat for transporting ducks (Vietnam)

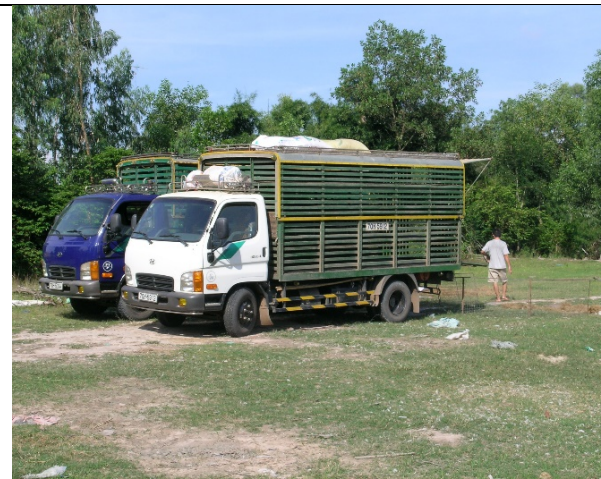

Truck for transporting ducks (Vietnam)

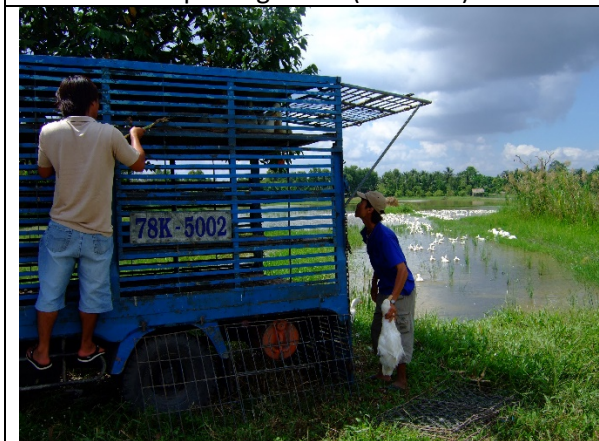

Unloading ducks (Vietnam)

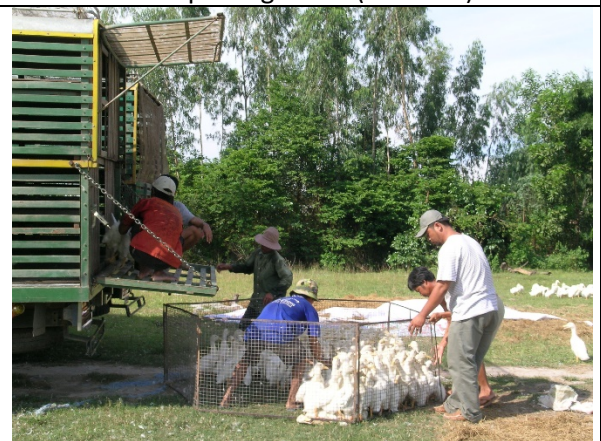

Unloading ducks (Vietnam)

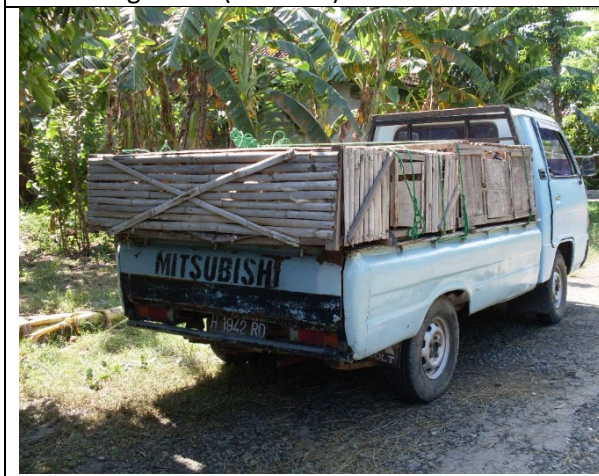

Truck for transporting ducks (Indonesia)

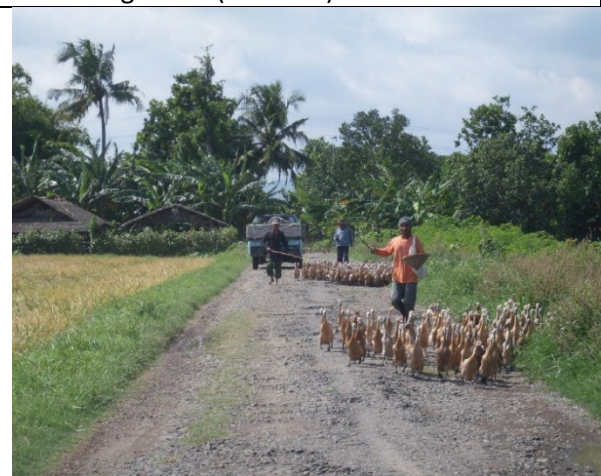

Herding of ducks (Indonesia)

**SUPPLEMENTARY FIGURE 1** | Images of types of transport used for moving duck flocks in Vietnam and Indonesia.

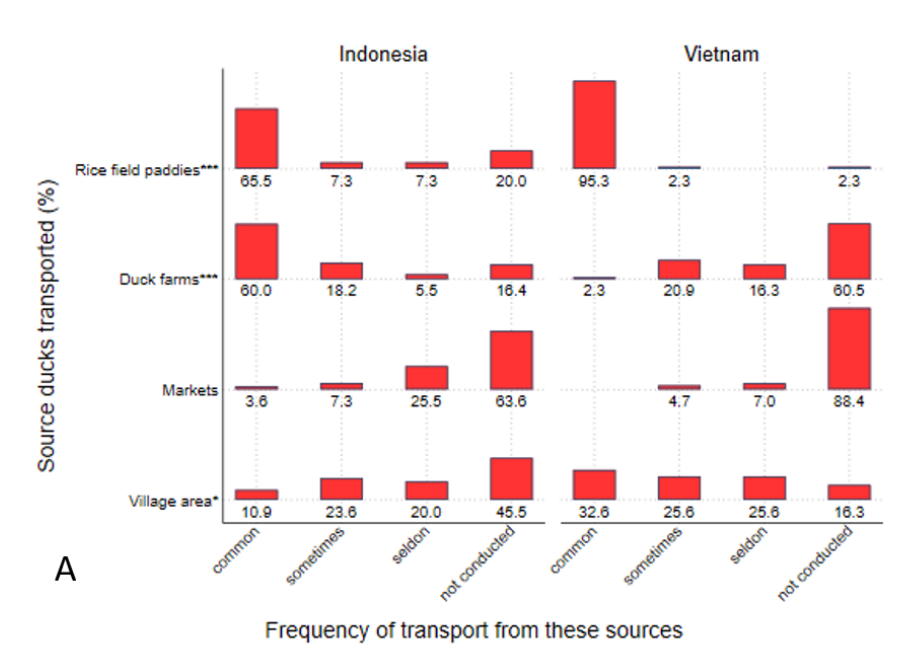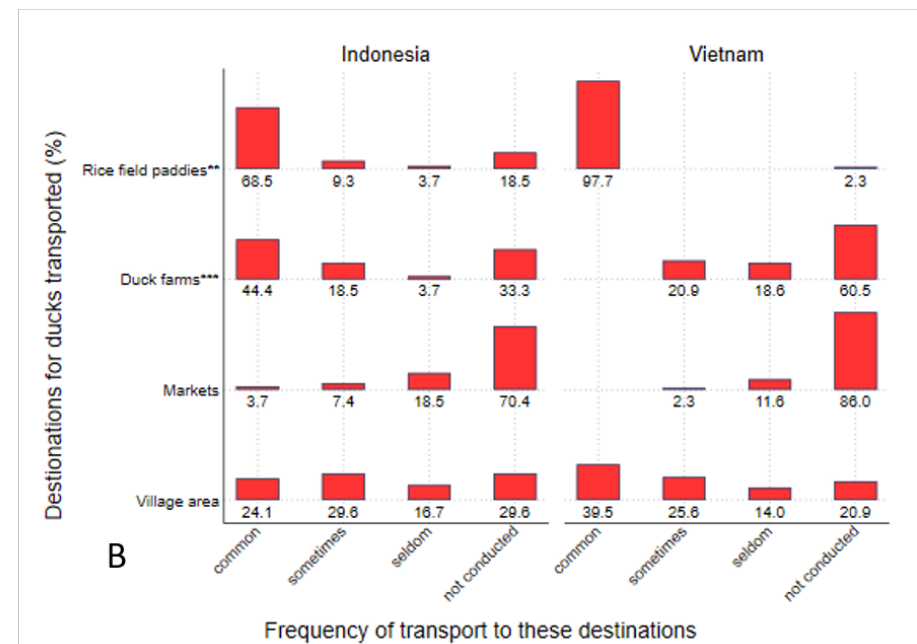

**SUPPLEMENTARY FIGURE 2 | (A)** Locations from where moving duck flocks were collected by transporters in Indonesia ( $N = 55$ ) and Vietnam ( $N = 43$ ). **(B)** Destinations to where moving duck flocks were delivered by transporters in Indonesia ( $N = 55$ ) and Vietnam ( $N = 43$ ). P-values for comparisons between countries for each category are presented as follows: \* for  $P \leq 0.05$ , \*\* for  $P \leq 0.01$ , \*\*\* for  $P \leq 0.001$ .

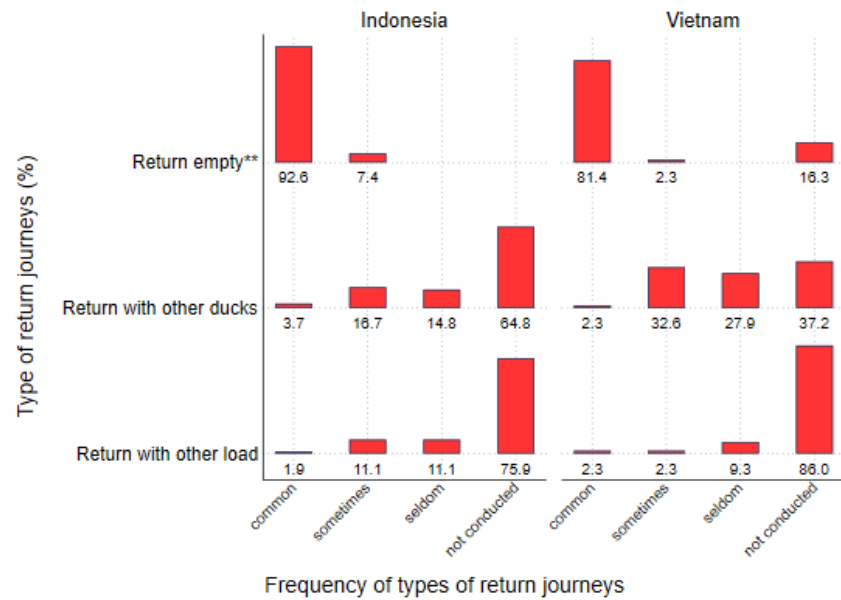

**SUPPLEMENTARY FIGURE 3 |** Characteristics of return journeys conducted by transporters in Indonesia (N=55) and Vietnam (N=43). P-values for comparisons between countries for each category are presented as follows: \*\* for  $P \leq 0.01$ .

**SUPPLEMENTARY TABLE 1** | Original responses by transport providers (recorded on a 5-scale Likert scale) on importance of transport activities, frequency of transporting items with duck flocks, frequency of deaths of ducks, and frequency of cleaning practices of transporter vehicles in Indonesia (N=55) and Vietnam (N=43).

|                                                  |                                                   | Indonesia      |           |               |               |             | Vietnam        |           |               |               |            |         |
|--------------------------------------------------|---------------------------------------------------|----------------|-----------|---------------|---------------|-------------|----------------|-----------|---------------|---------------|------------|---------|
|                                                  |                                                   | % (N)          |           |               |               |             | % (N)          |           |               |               |            |         |
| Importance of transport activities               | transport activities                              | very important | important | not important | not conducted | total       | very important | important | not important | not conducted | total      | p-value |
|                                                  | transport of ducks to scavenging locations        | 60.0 (33)      | 38.2 (21) | 1.8 (1)       | 0.0 (0)       | 100.0 (55)  | 67.4 (29)      | 27.9 (12) | 2.3 (1)       | 2.3 (1)       | 100.0 (43) | 0.58    |
|                                                  | transport of ducks to markets                     | 5.5 (3)        | 10.9 (6)  | 27.3 (15)     | 56.4 (31)     | 100.0 (55)  | 2.3 (1)        | 7.0 (3)   | 11.6 (5)      | 79.1 (34)     | 100.0 (43) | 0.38    |
|                                                  | transport of ducks to or from hatcheries          | 5.5 (3)        | 14.5 (8)  | 21.8 (12)     | 58.2 (32)     | 100.0 (55)  | 7.0 (3)        | 0.0 (0)   | 11.6 (5)      | 81.4 (35)     | 100.0 (43) | 0.085   |
|                                                  | transport of chickens or other animals to markets | 0.9 (1)        | 0.0 (0)   | 12.7 (14)     | 86.4 (95)     | 100.0 (110) | 0.0 (0)        | 1.2 (1)   | 4.7 (4)       | 94.2 (81)     | 100.0 (86) | 1       |
|                                                  | transport of feed                                 | 3.6 (2)        | 21.8 (12) | 16.4 (9)      | 58.2 (32)     | 100.0 (55)  | 0.0 (0)        | 2.3 (1)   | 25.6 (11)     | 72.1 (31)     | 100.0 (43) | 0.0014  |
|                                                  | transport of other items                          | 32.7 (18)      | 16.4 (9)  | 18.2 (10)     | 32.7 (18)     | 100.0 (55)  | 4.8 (2)        | 4.8 (2)   | 11.9 (5)      | 78.6 (33)     | 100.0 (42) | <0.001  |
|                                                  | other sources of income                           | 49.1 (27)      | 9.1 (5)   | 7.3 (4)       | 34.5 (19)     | 100.0 (55)  | 7.0 (3)        | 16.3 (7)  | 2.3 (1)       | 74.4 (32)     | 100.0 (43) | 0.00089 |
| Frequency of transporting items with duck flocks | items transported together with duck flocks       | common         | sometimes | seldom        | not conducted | total       | common         | sometimes | seldom        | not conducted | total      | p-value |
|                                                  | chickens                                          | 5.5 (3)        | 0.0 (0)   | 9.1 (5)       | 85.5 (47)     | 100.0 (55)  | 2.3 (1)        | 0.0 (0)   | 4.7 (2)       | 93 (40)       | 100.0 (43) | 0.63    |
|                                                  | other animals                                     | 0.0 (0)        | 0.0 (0)   | 10.9 (6)      | 89.1 (49)     | 100.0 (55)  | 0 (0)          | 9.3 (4)   | 4.7 (2)       | 86 (37)       | 100.0 (43) | 0.034   |
|                                                  | duck feed                                         | 20 (11)        | 25.5 (14) | 25.5 (14)     | 29.1 (16)     | 100.0 (55)  | 4.7 (2)        | 23.3 (10) | 23.3 (10)     | 48.8 (21)     | 100.0 (43) | 0.094   |
|                                                  | other animal feed                                 | 1.8 (1)        | 3.6 (2)   | 16.4 (9)      | 78.2 (43)     | 100.0 (55)  | 0.0 (0)        | 4.7 (2)   | 7 (3)         | 88.4 (38)     | 100.0 (43) | 1       |
|                                                  | eggs                                              | 9.1 (5)        | 30.9 (17) | 14.5 (8)      | 45.5 (25)     | 100.0 (55)  | 0.0 (0)        | 0.0 (0)   | 4.7 (2)       | 95.3 (41)     | 100.0 (43) | <0.001  |
|                                                  | other items                                       | 5.5 (3)        | 9.1 (5)   | 1.8 (1)       | 83.6 (46)     | 100.0 (55)  | 0.0 (0)        | 4.7 (2)   | 0.0 (0)       | 95.3 (41)     | 100.0 (43) | 0.18    |

|                                              |                                                     |           |           |           |               |            |           |           |           |               |            |         |
|----------------------------------------------|-----------------------------------------------------|-----------|-----------|-----------|---------------|------------|-----------|-----------|-----------|---------------|------------|---------|
| frequency of duck deaths                     | causes of duck deaths during transport              | common    | sometimes | seldom    | not conducted | total      | common    | sometimes | seldom    | not conducted | total      | p-value |
|                                              | disease                                             | 1.8 (1)   | 14.5 (8)  | 25.5 (14) | 58.2 (32)     | 100.0 (55) | 0.0 (0)   | 4.7 (2)   | 4.7 (2)   | 90.7 (39)     | 100.0 (43) | 0.11    |
|                                              | dehydration                                         | 12.7 (7)  | 18.2 (10) | 25.5 (14) | 43.6 (24)     | 100.0 (55) | 16.3 (7)  | 55.8 (24) | 18.6 (8)  | 9.3 (4)       | 100.0 (43) | <0.001  |
|                                              | injury during transport                             | 7.3 (4)   | 49.1 (27) | 23.6 (13) | 20.0 (11)     | 100.0 (55) | 9.3 (4)   | 44.2 (19) | 32.6 (14) | 14.0 (6)      | 100.0 (43) | 0.84    |
|                                              | other causes                                        | 1.8 (1)   | 1.8 (1)   | 25.5 (14) | 70.9 (39)     | 100.0 (55) | 0.0 (0)   | 0.0 (0)   | 0.0 (0)   | 100.0 (43)    | 100.0 (43) | 0.5     |
|                                              | unknown                                             | 0.0 (0)   | 0.0 (0)   | 5.5 (3)   | 94.5 (52)     | 100.0 (55) | 0.0 (0)   | 0.0 (0)   | 0.0 (0)   | 100.0 (43)    | 100.0 (43) | 1       |
|                                              |                                                     |           |           |           |               |            |           |           |           |               |            |         |
| frequency of cleaning practices              | cleaning practices of transport vehicles            | common    | sometimes | seldom    | not conducted | total      | common    | sometimes | seldom    | not conducted | total      | p-value |
|                                              | removing faeces from the loading surface            | 96.4 (53) | 3.6 (2)   | 0.0 (0)   | 0.0 (0)       | 100.0 (55) | 97.7 (42) | 2.3 (1)   | 0.0 (0)   | 0.0 (0)       | 100.0 (43) | 1       |
|                                              | washing the loading surface with water              | 94.5 (52) | 1.8 (1)   | 0.0 (0)   | 3.6 (2)       | 100.0 (55) | 83.7 (36) | 14 (6)    | 2.3 (1)   | 0.0 (0)       | 100.0 (43) | 1       |
|                                              | washing the loading surface with soap               | 50.9 (28) | 25.5 (14) | 10.9 (6)  | 12.7 (7)      | 100.0 (55) | 23.3 (10) | 23.3 (10) | 11.6 (5)  | 41.9 (18)     | 100.0 (43) | 0.0031  |
|                                              | disinfection of the loading surface                 | 3.6 (2)   | 1.8 (1)   | 14.5 (8)  | 80 (44)       | 100.0 (55) | 34.9 (15) | 20.9 (9)  | 18.6 (8)  | 25.6 (11)     | 100.0 (43) | <0.001  |
|                                              | cleaning of the loading surface with compressed air | 1.8 (1)   | 1.8 (1)   | 23.6 (13) | 72.7 (40)     | 100.0 (55) | 0.0 (0)   | 0.0 (0)   | 4.7 (2)   | 95.3 (41)     | 100.0 (43) | 0.5     |
|                                              |                                                     |           |           |           |               |            |           |           |           |               |            |         |
| frequency of transport from these sources    | source ducks transported                            | common    | sometimes | seldom    | not conducted | total      | common    | sometimes | seldom    | not conducted | total      | p-value |
|                                              | rice field paddies                                  | 65.5 (36) | 7.3 (4)   | 7.3 (4)   | 20 (11)       | 100.0 (55) | 95.3 (41) | 2.3 (1)   | 0.0 (0)   | 2.3 (1)       | 100.0 (43) | <0.001  |
|                                              | duck farms                                          | 60.0 (33) | 18.2 (10) | 5.5 (3)   | 16.4 (9)      | 100.0 (55) | 2.3 (1)   | 20.9 (9)  | 16.3 (7)  | 60.5 (26)     | 100.0 (43) | <0.001  |
|                                              | markets                                             | 3.6 (2)   | 7.3 (4)   | 25.5 (14) | 63.6 (35)     | 100.0 (55) | 0.0 (0)   | 4.7 (2)   | 7.0 (3)   | 88.4 (38)     | 100.0 (43) | 0.46    |
|                                              | Village areas#                                      | 10.9 (6)  | 23.6 (13) | 20.0 (11) | 45.5 (25)     | 100.0 (55) | 32.6 (14) | 25.6 (11) | 25.6 (11) | 16.3 (7)      | 100.0 (43) | 0.025   |
| frequency of transport to these destinations | destinations for ducks transported                  | common    | sometimes | seldom    | not conducted | total      | common    | sometimes | seldom    | not conducted | total      | p-value |
|                                              | rice field paddies                                  | 68.5 (37) | 9.3 (5)   | 3.7 (2)   | 18.5 (10)     | 100.0 (54) | 97.7 (42) | 0.0 (0)   | 0.0 (0)   | 2.3 (1)       | 100.0 (43) | 0.0054  |
|                                              | duck farms                                          | 44.4 (24) | 18.5 (10) | 3.7 (2)   | 33.3 (18)     | 100.0 (54) | 0.0 (0)   | 20.9 (9)  | 18.6 (8)  | 60.5 (26)     | 100.0 (43) | <0.001  |

|                |           |           |           |           |            |           |           |          |           |            |      |
|----------------|-----------|-----------|-----------|-----------|------------|-----------|-----------|----------|-----------|------------|------|
| markets        | 3.7 (2)   | 7.4 (4)   | 18.5 (10) | 70.4 (38) | 100.0 (54) | 0.0 (0)   | 2.3 (1)   | 11.6 (5) | 86.0 (37) | 100.0 (43) | 0.13 |
| Village areas# | 24.1 (13) | 29.6 (16) | 16.7 (9)  | 29.6 (16) | 100.0 (54) | 39.5 (17) | 25.6 (11) | 14.0 (6) | 20.9 (9)  | 100.0 (43) | 0.3  |

---

| frequencies of types of return journeys | type of return journeys | common    | sometimes | seldom   | not conducted | total      | common    | sometimes | seldom    | not conducted | total      | p-value |
|-----------------------------------------|-------------------------|-----------|-----------|----------|---------------|------------|-----------|-----------|-----------|---------------|------------|---------|
|                                         | return empty            | 92.6 (50) | 7.4 (4)   | 0.0 (0)  | 0.0 (0)       | 100.0 (54) | 81.4 (35) | 2.3 (1)   | 0.0 (0)   | 16.3 (7)      | 100.0 (43) | 0.0025  |
|                                         | return with other ducks | 3.7 (2)   | 16.7 (9)  | 14.8 (8) | 64.8 (35)     | 100.0 (54) | 2.3 (1)   | 32.6 (14) | 27.9 (12) | 37.2 (16)     | 100.0 (43) | 0.17    |
|                                         | return with other load  | 1.9 (1)   | 11.1 (6)  | 11.1 (6) | 75.9 (41)     | 100.0 (54) | 2.3 (1)   | 2.3 (1)   | 9.3 (4)   | 86.0 (37)     | 100.0 (43) | 0.29    |

# represents areas other than duck farms that contain ducks within village boundaries
